# Supplementary material for: Molecular subtyping and IMScore based on immune-related pathways, oncogenic pathways, and DNA damage repair pathways for guiding immunotherapy in hepatocellular carcinoma patients
Source: PubMed Central journal article supplement — J Gastrointest Oncol. 2022 Dec;13(6):3135–53. doi: 10.21037/jgo-22-1101 (PMC9830348; doi:10.21037/jgo-22-1101), 2022-12
Supplement: jgo-13-06-3135-supplementary.pdf [file jgo-13-06-3135-supplementary.pdf]

**Table S1** The clinical information of HCC samples with RNA-seq data in TCGA and HCCDB18 datasets

| Clinical Features | TCGA-LIHC | HCCDB18 |
|-------------------|-----------|---------|
| OS                |           |         |
| 0                 | 235       | 168     |
| 1                 | 130       | 35      |
| T Stage           |           |         |
| T1                | 180       | 33      |
| T2                | 91        | 96      |
| T3                | 78        | 59      |
| T4                | 13        | 15      |
| TX                | 3         |         |
| N Stage           |           |         |
| N0                | 248       |         |
| N1                | 4         |         |
| NX                | 113       |         |
| M Stage           |           |         |
| M0                | 263       |         |
| M1                | 3         |         |
| MX                | 99        |         |
| Stage             |           |         |
| I                 | 170       |         |
| II                | 84        |         |
| III               | 83        |         |
| IV                | 4         |         |
| X                 | 24        |         |
| Grade             |           |         |
| G1                | 55        |         |
| G2                | 175       |         |
| G3                | 118       |         |
| G4                | 12        |         |
| GX                | 5         |         |
| Gender            |           |         |
| Male              | 246       | 153     |
| Female            | 119       | 50      |
| Age               |           |         |
| ≤60               | 173       | 43      |
| >60               | 192       | 160     |

HCC, hepatocellular carcinoma; TCGA, The Cancer Genome Atlas; OS, overall survival.

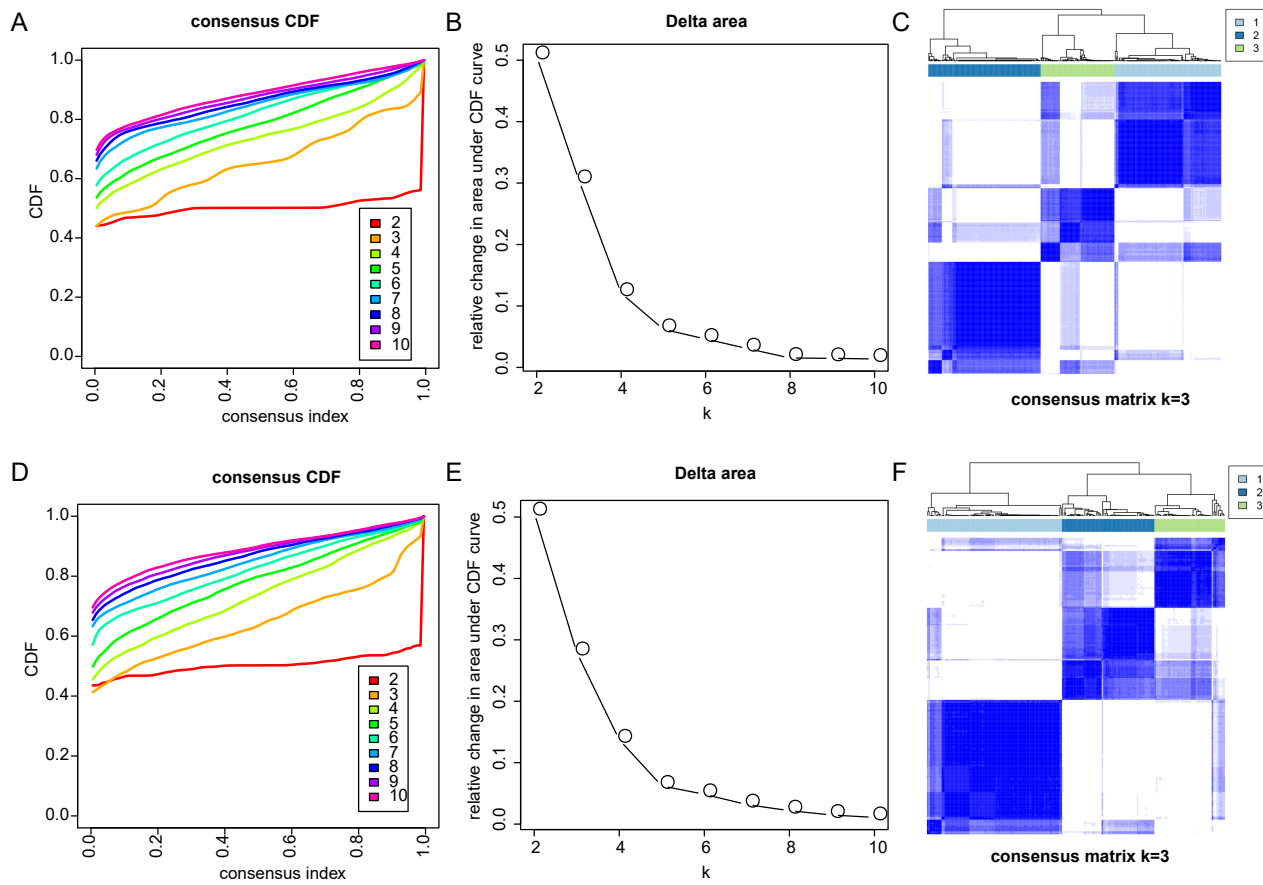

**Figure S1** Consensus clustering of HCC samples in TCGA (A-C) and HCCDB18 (D-F) datasets. HCC, hepatocellular carcinoma; CDF, cumulative distribution function.

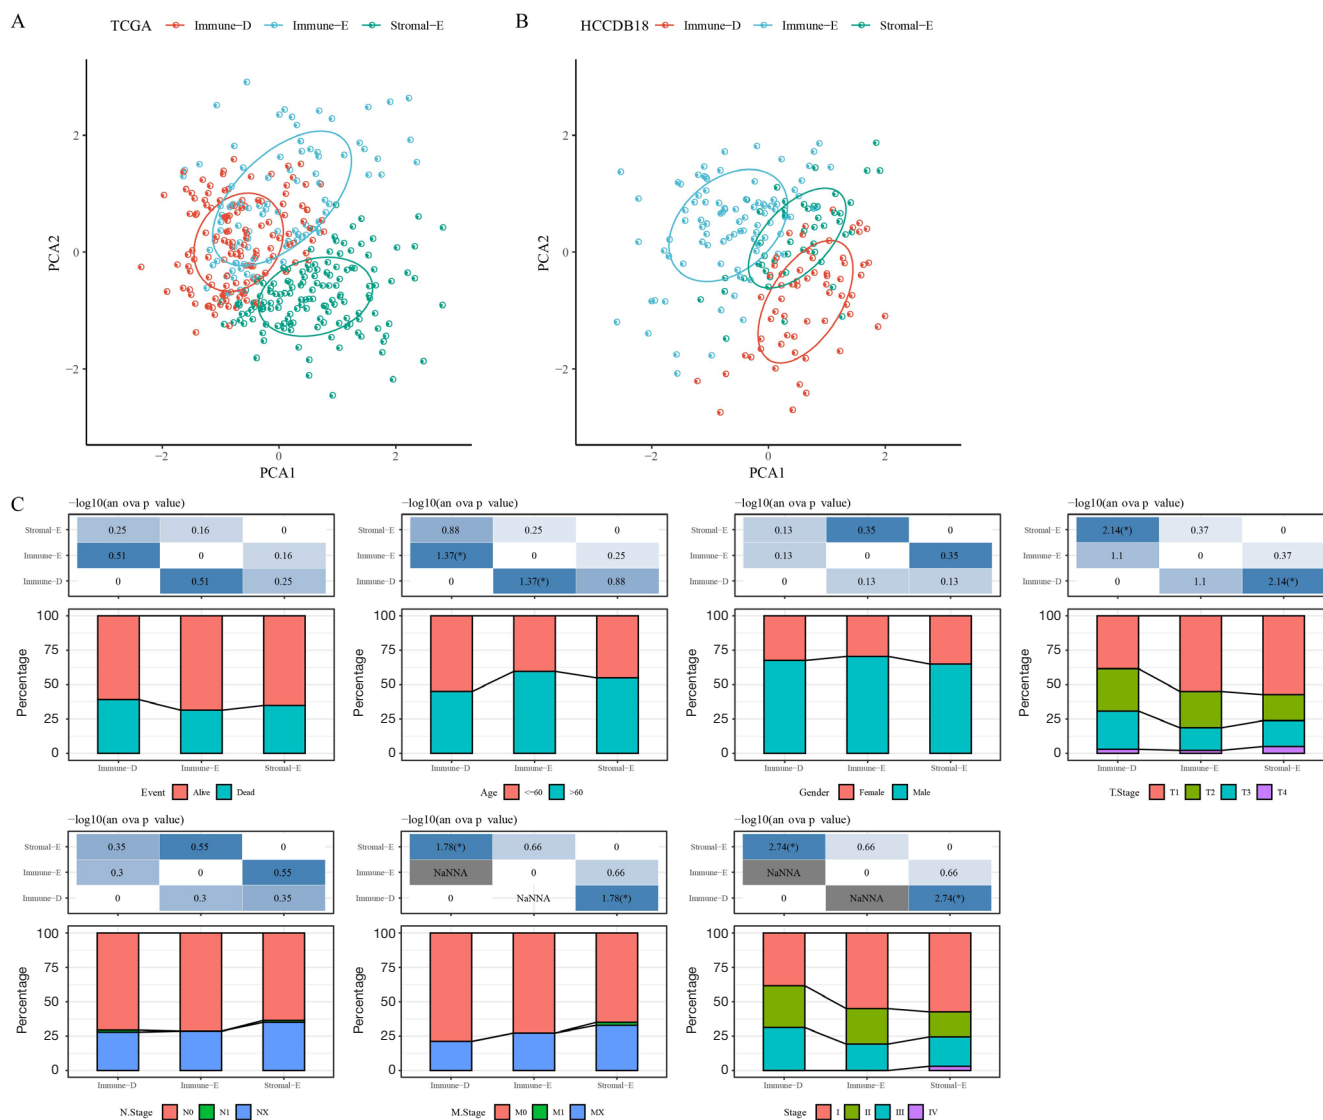

**Figure S2** (A,B) PCA plots of the samples in TCGA and HCCDB18 datasets grouped by 3 clusters. (C) The distribution of different clinical characteristics in three clusters in TCGA dataset. ANOVA was conducted. \*, P<0.05. NaNNA, no statistical test was performed as the unbalanced distribution of samples. PCA, principal component analysis; TCGA, The Cancer Genome Atlas; ANOVA, analysis of variance.

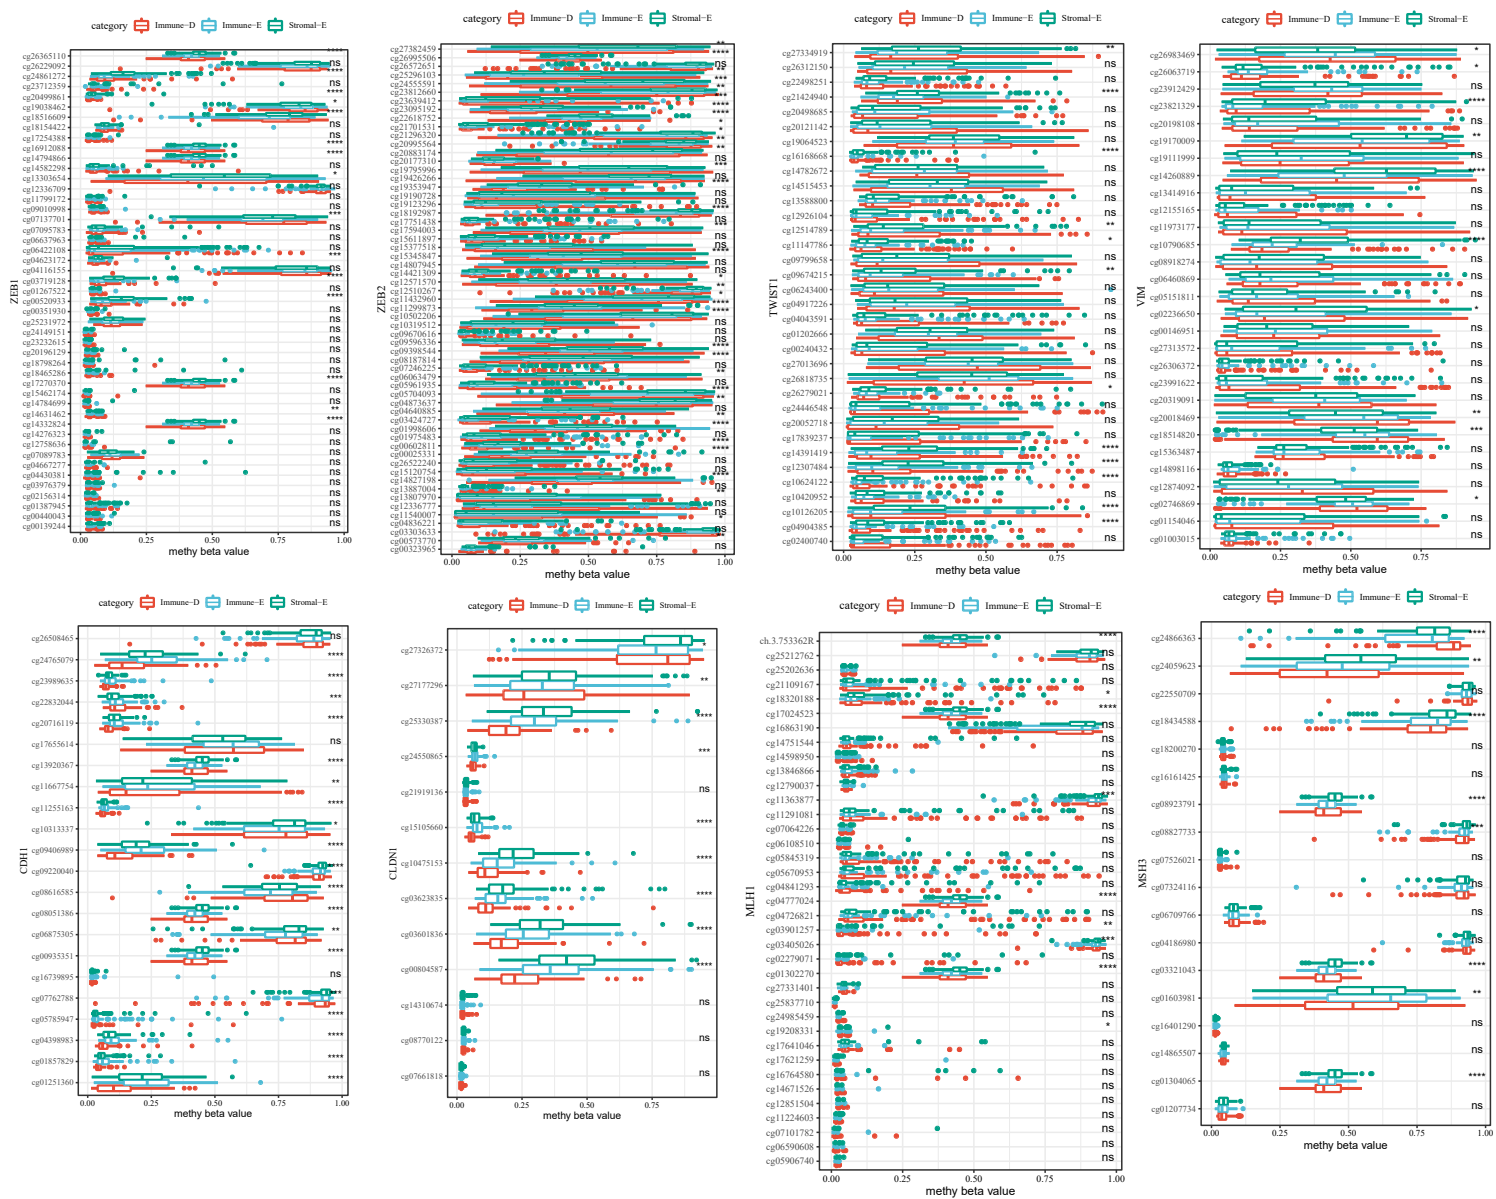

**Figure S3** The methylation beta values of cg sites of EMT and DNA repair-related genes in three clusters. ns, not significant. \*,  $P < 0.05$ ; \*\*,  $P < 0.01$ ; \*\*\*,  $P < 0.001$ ; \*\*\*\*,  $P < 0.0001$ . EMT, epithelial-mesenchymal transition.

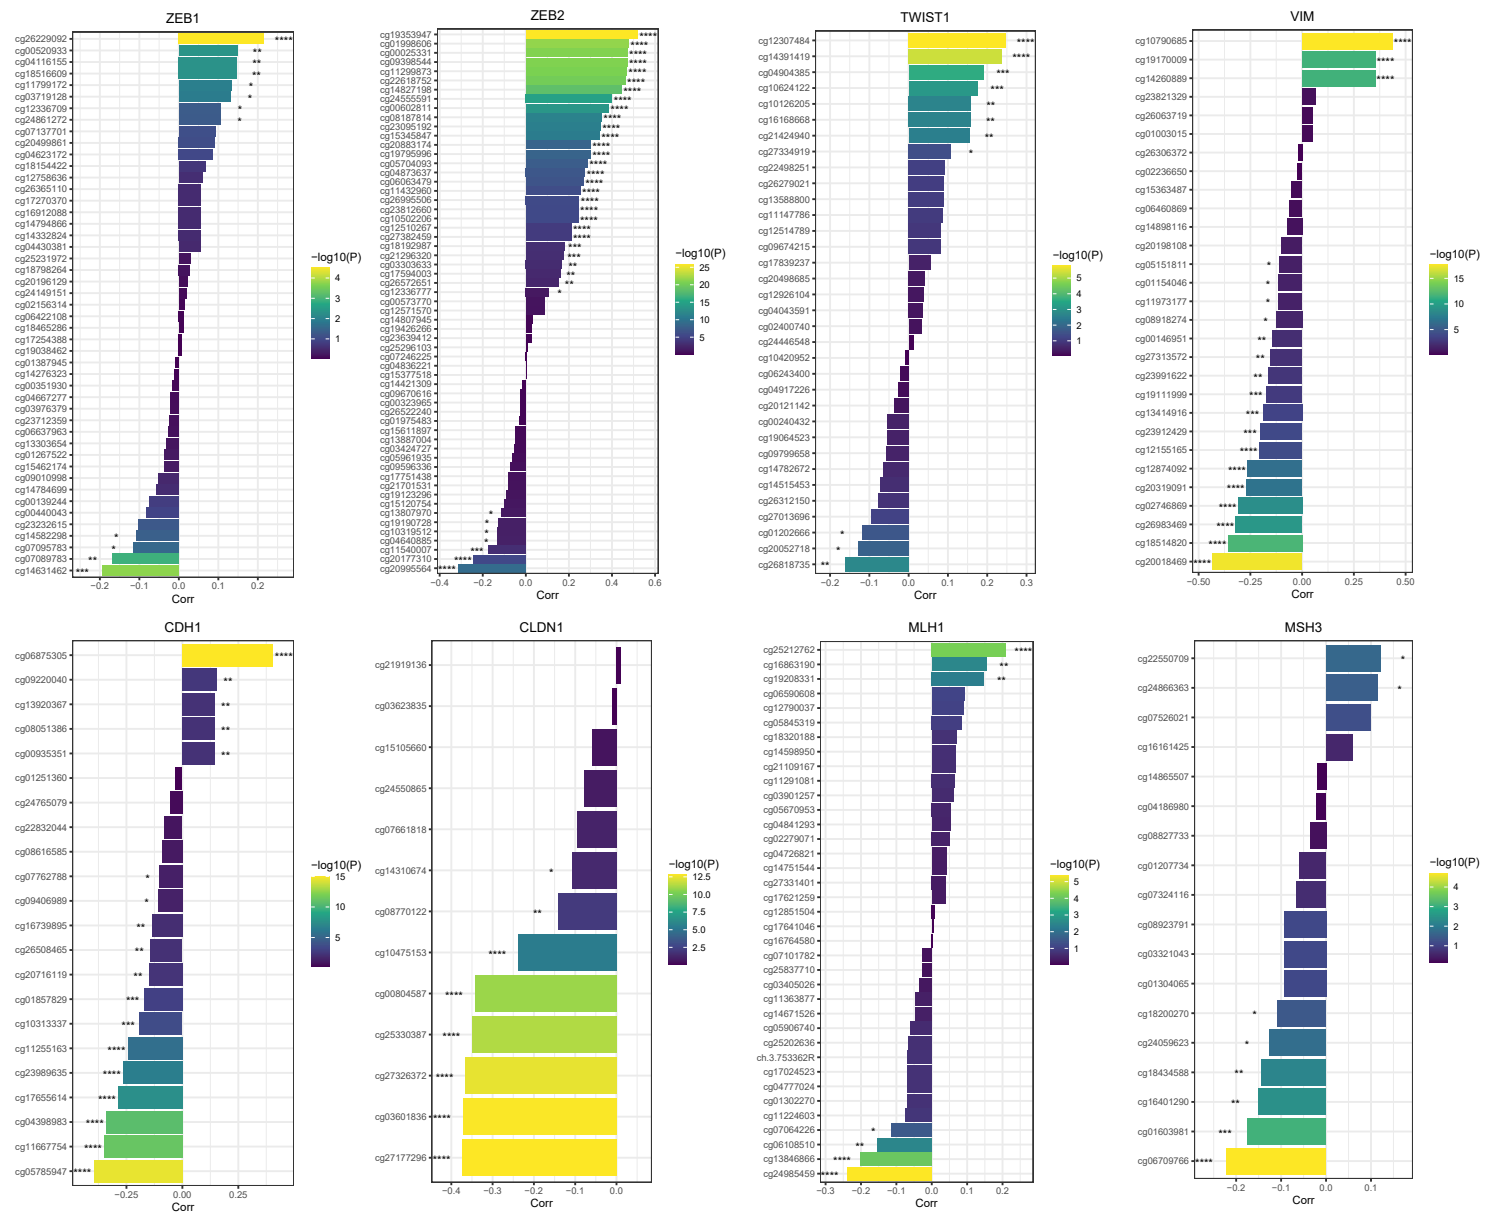

**Figure S4** Pearson correlation analysis of gene expression with the methylation beta values of cg sites in EMT and DNA repair-related genes. EMT, epithelial-mesenchymal transition. \*,  $P < 0.05$ ; \*\*,  $P < 0.01$ ; \*\*\*,  $P < 0.001$ ; \*\*\*\*,  $P < 0.0001$ .

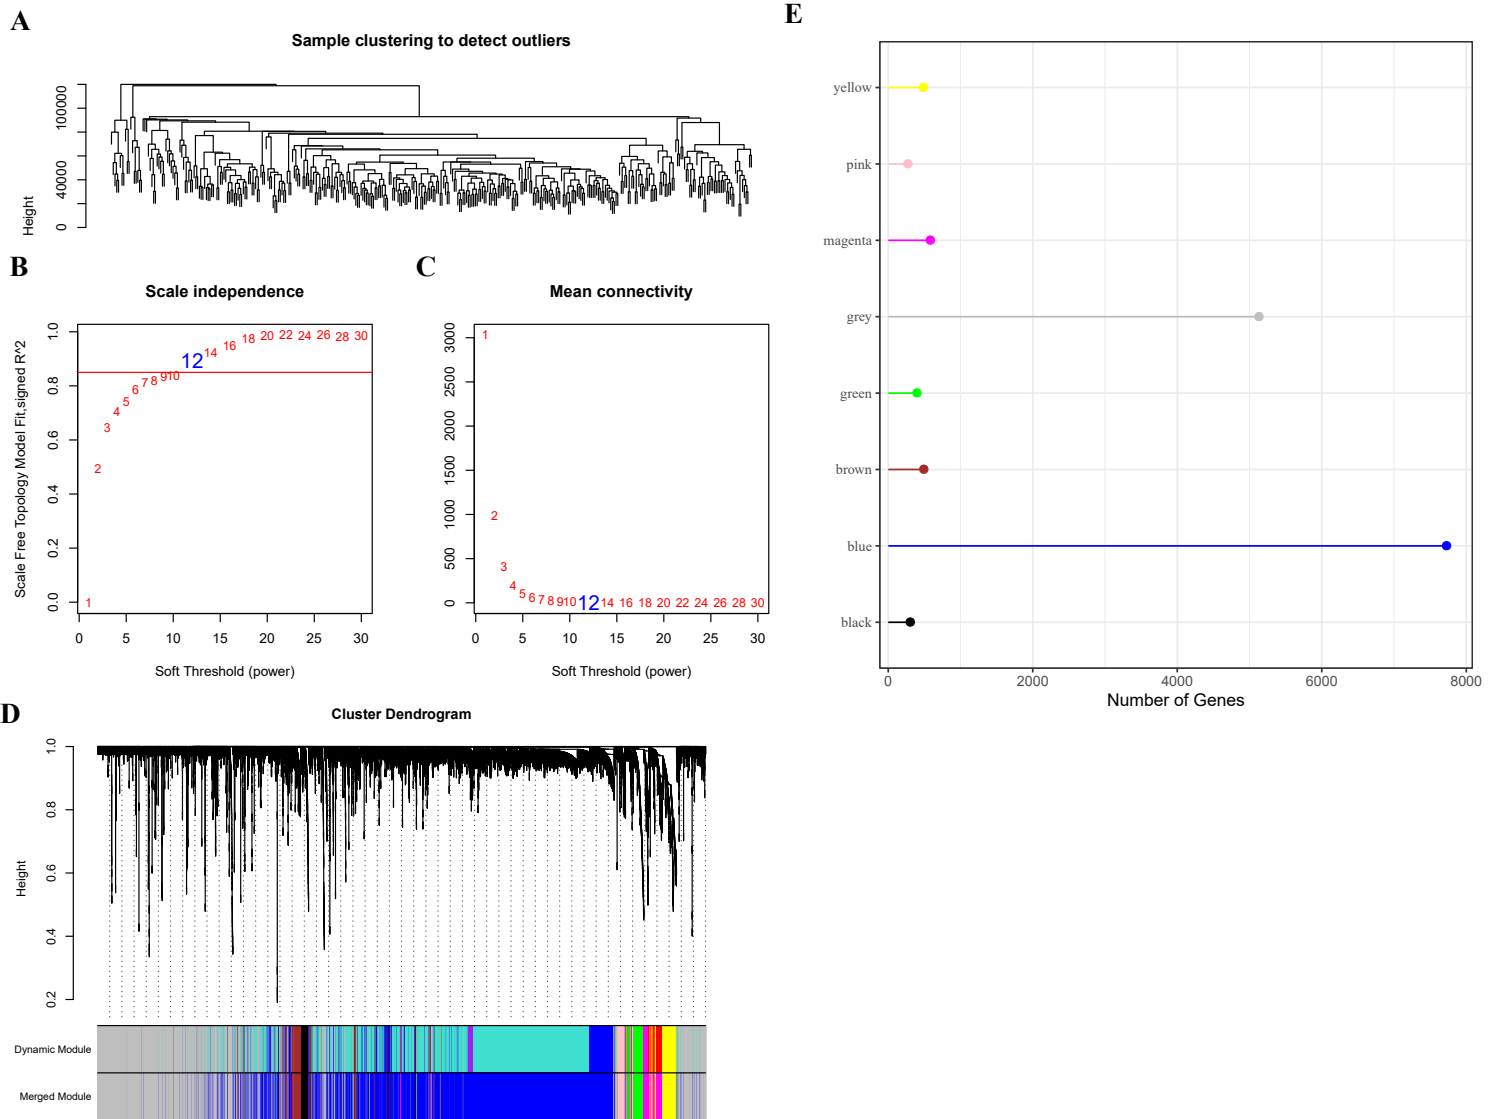

**Figure S5** WGCNA for the samples in TCGA dataset. (A) Clustering of samples to screen co-expression modules. (B,C) Determining the soft threshold for constructing a scale-free network. Red line indicates the power of soft threshold = 12 and the fit of scale-free topology model =0.85. (D) Combination of adjacent modules based on epigeneses. (E) Number of genes in 8 gene modules. WGCNA, weighted correlation network analysis; TCGA, The Cancer Genome Atlas.

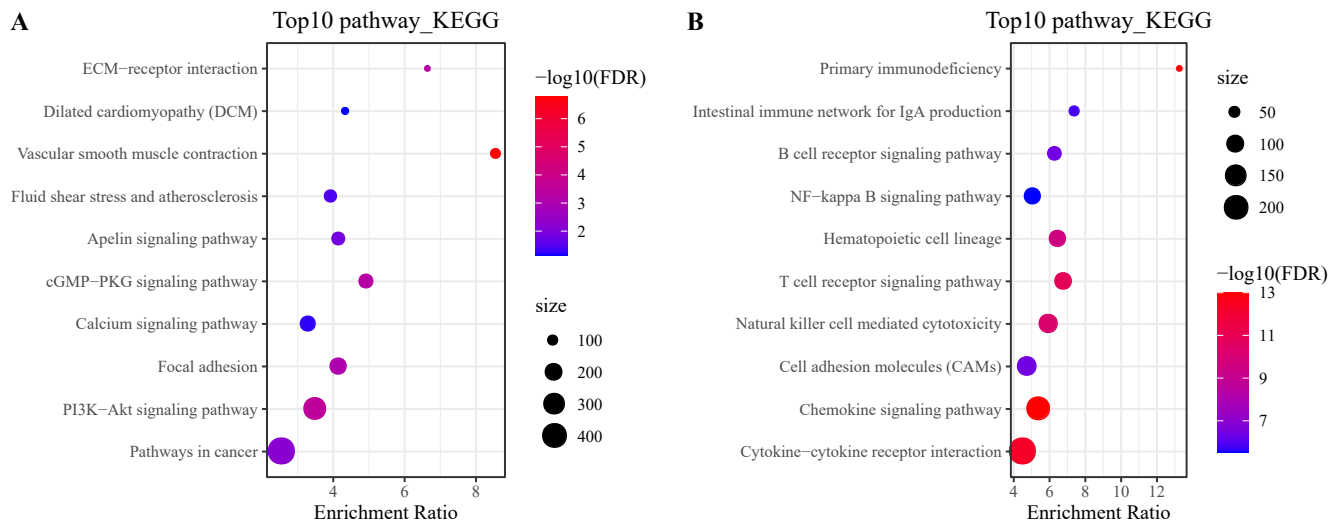

**Figure S6** The top 10 enriched KEGG pathways in the pink and yellow modules. KEGG, Kyoto Encyclopedia of Genes and Genomes; FDR, false discovery rate.

**Table S2** Univariate Cox regression of 15 pathways

| Pathways                                  | P value  | HR       | Low 95% CI | High 95% CI |
|-------------------------------------------|----------|----------|------------|-------------|
| Natural killer cell mediated cytotoxicity | 0.057829 | 0.05748  | 0.003005   | 1.09946     |
| Antigen processing and presentation       | 0.152237 | 0.214945 | 0.026199   | 1.763487    |
| T cell receptor signaling                 | 0.123136 | 0.110703 | 0.006746   | 1.816703    |
| B cell receptor signaling                 | 0.189311 | 0.146961 | 0.008389   | 2.574611    |
| Fc gamma R-mediated phagocytosis          | 0.261965 | 4.876934 | 0.306055   | 77.71299    |
| ECM-receptor interaction                  | 0.818133 | 1.219522 | 0.224672   | 6.619584    |
| Focal adhesion                            | 0.771591 | 0.686531 | 0.054181   | 8.699041    |
| Tight junction                            | 0.108424 | 0.033959 | 0.000546   | 2.111249    |
| p53 signaling                             | 0.024364 | 43.97972 | 1.631817   | 1185.314    |
| Mismatch repair                           | 0.009223 | 10.69646 | 1.796656   | 63.68177    |
| Homologous recombination                  | 0.000454 | 26.7835  | 4.26408    | 168.2323    |
| PI3K-Akt signaling                        | 0.479291 | 0.266955 | 0.006877   | 10.36299    |
| Wnt signaling                             | 0.455062 | 3.219096 | 0.149815   | 69.16904    |
| TGF-beta signaling                        | 0.630128 | 0.530694 | 0.040264   | 6.994662    |
| Cell cycle                                | 1.56E-06 | 137.4686 | 18.43778   | 1024.941    |

CI, confidence interval.

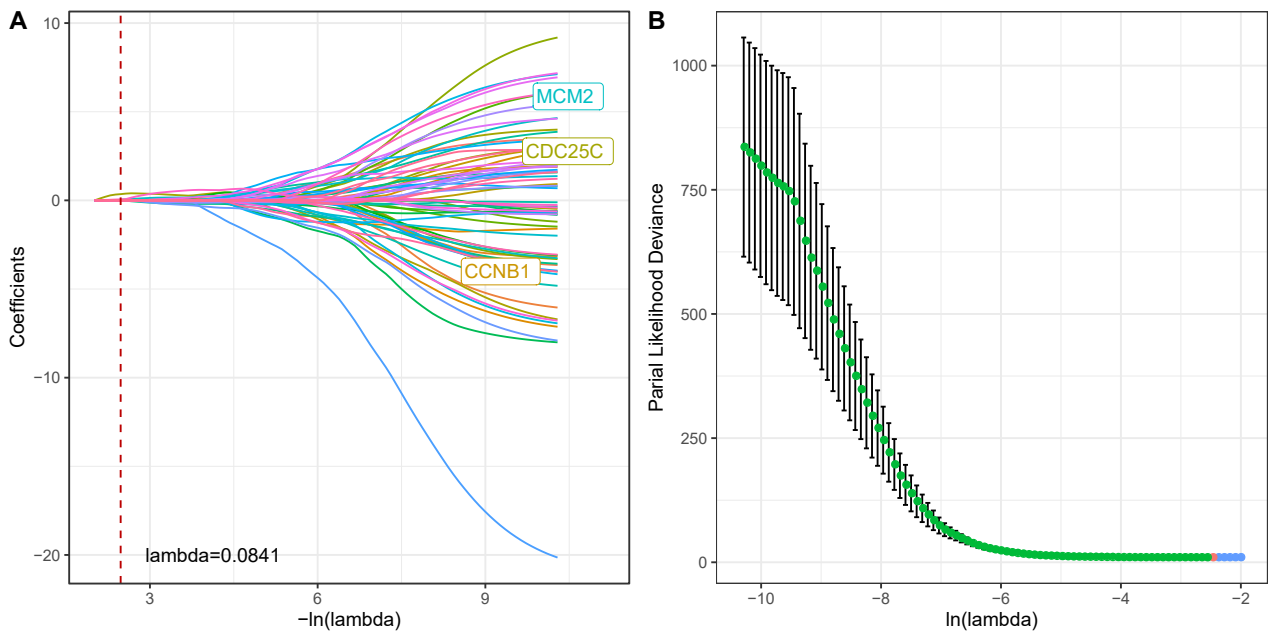

**Figure S7** LASSO regression analysis for 70 genes. Dotted red line in (A) and red dot in (B) indicates  $\lambda = 0.0841$ . KEGG, Kyoto Encyclopedia of Genes and Genomes; LASSO, least absolute shrinkage and selection operator.



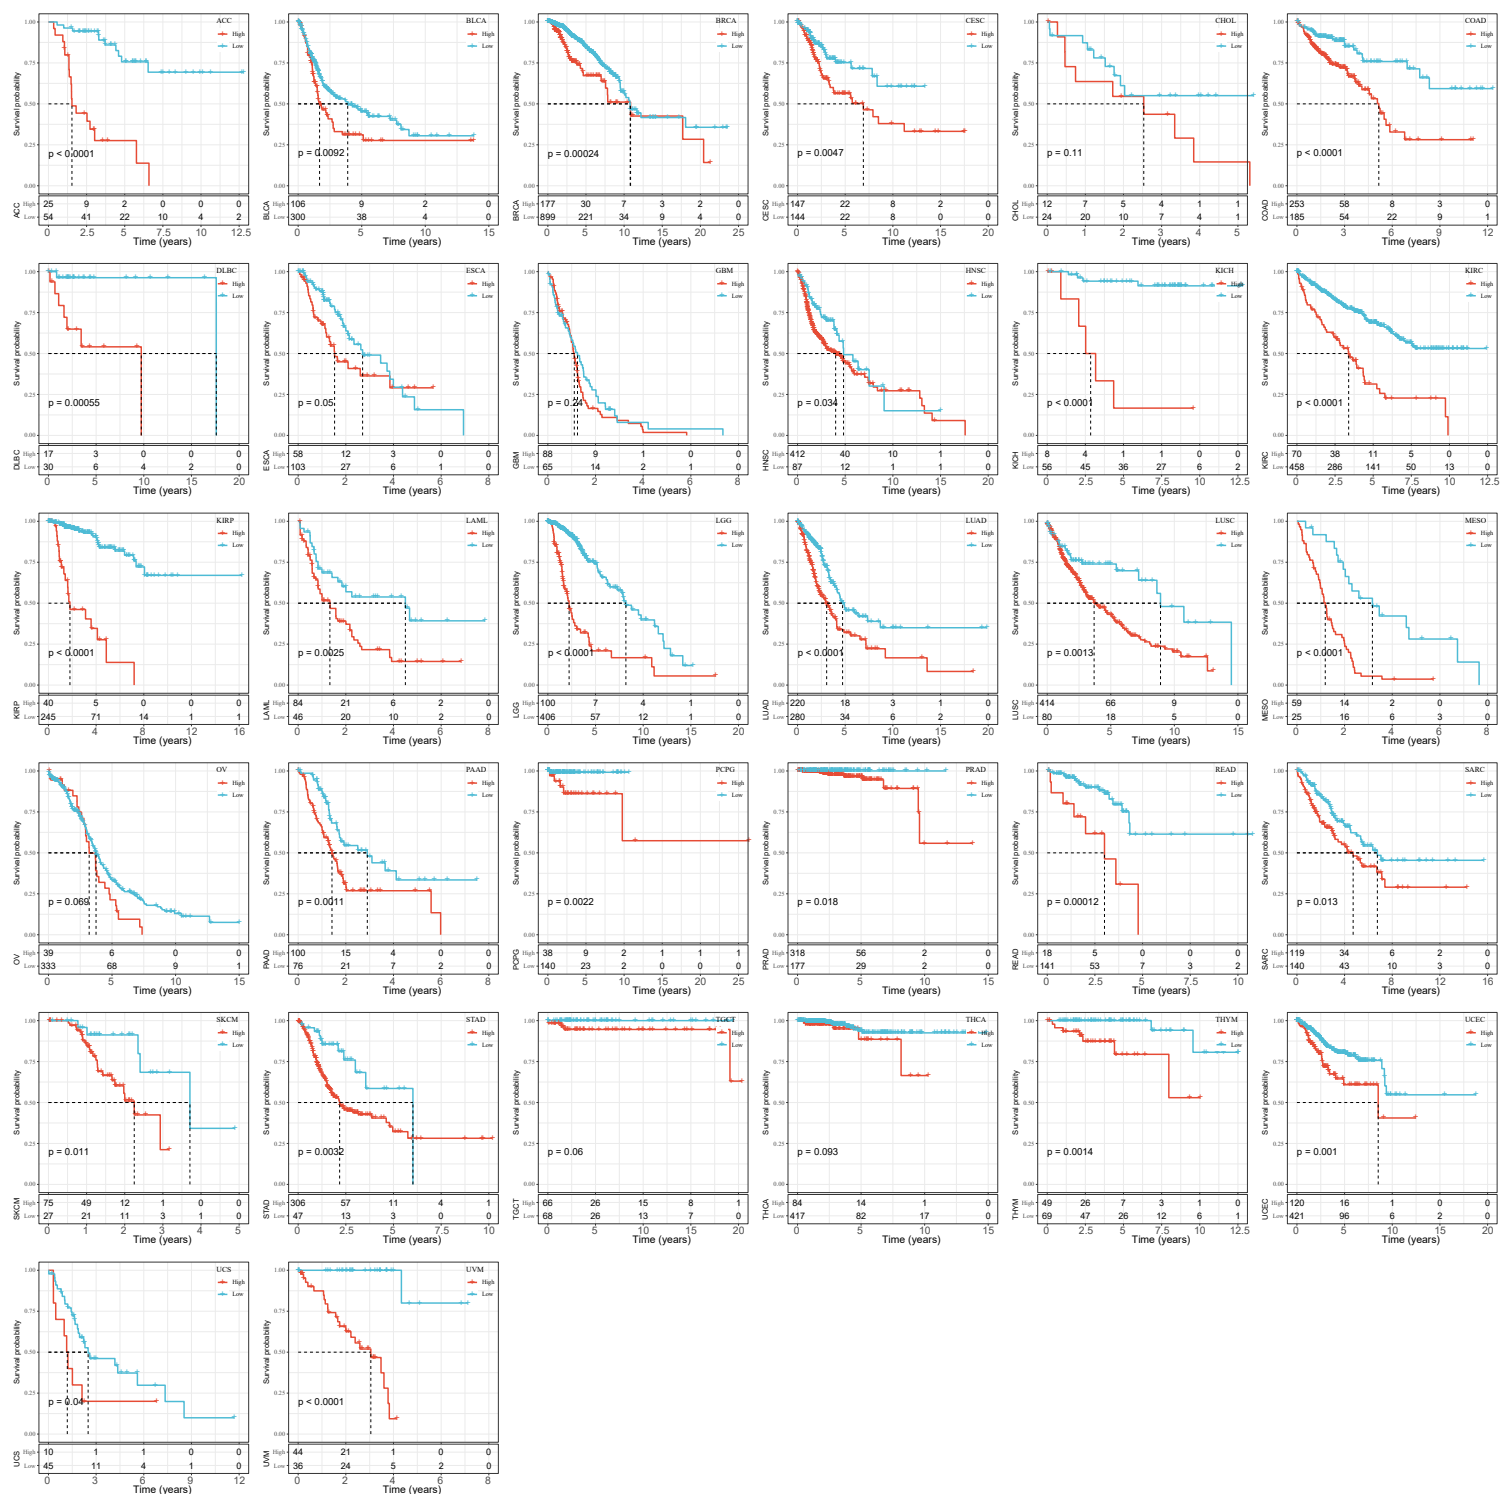

Figure S8 The performance of the IMScore model in 32 cancer types. Log-rank test was conducted.
